# Supplementary material
Source: Springer Nature journal article supplement (https://www.springermedizin.de/resource/supplementary/12884_2013_825_MOESM5_ESM.pdf/9458284)

PC # 1

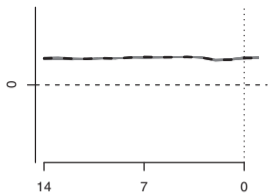

PC # 2

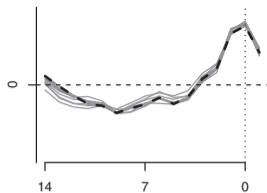

PC # 3

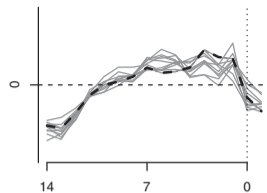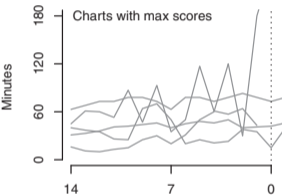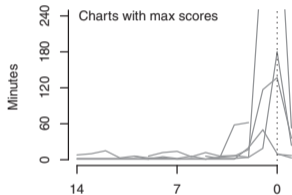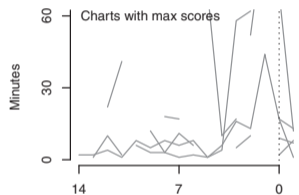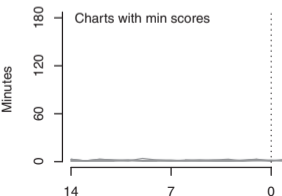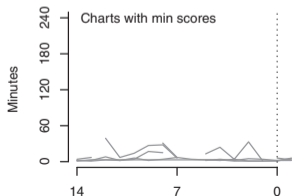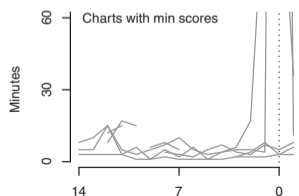

Days before DFM consultation

Supplement: MOESM5 [file 9458284]
